# Supplementary material for: Iron from nanostructured ferric phosphate: absorption and biodistribution in mice and bioavailability in iron deficient anemic women
Source: PubMed Central journal article supplement (PMC8857185; doi:10.1038/s41598-022-06701-x), 2022-02-18
Supplement: 41598_2022_6701_MOESM1_ESM.pdf [file 41598_2022_6701_MOESM1_ESM.pdf]

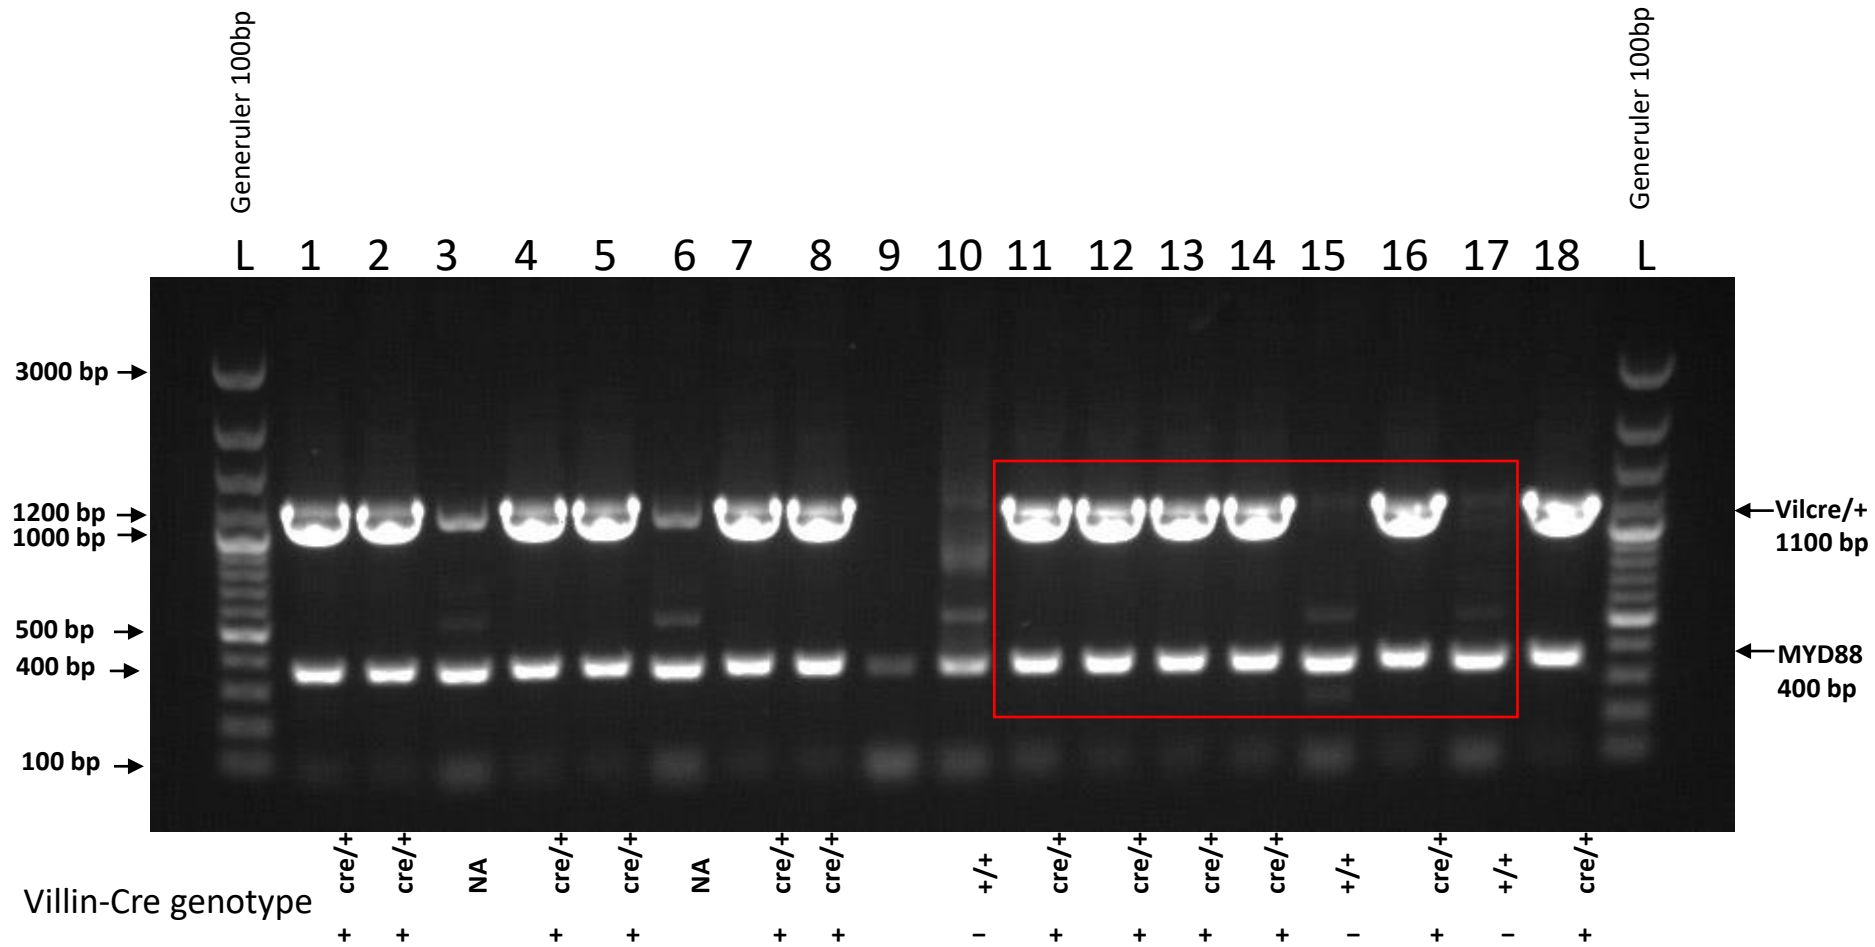

**Supplementary Figure 1:** Villin-cre genotyping visualised with a 1 % TAE Ethidium bromide stained agarose gel. Generuler 100 bp used as DNA marker. Electrophoresis was done for 30 min at 120V. Red squared section cropped and compiled as Figure 2a.
